# Supplementary material for: Heat shock transcriptional factors in Malus domestica: identification, classification and expression analysis
Source: PubMed Central journal article supplement (PMC3575323; doi:10.1186/1471-2164-13-639), 2012-11-20

**Additional file 1-Temperature average in the orchard where apple trees were grown during 2011 season.**

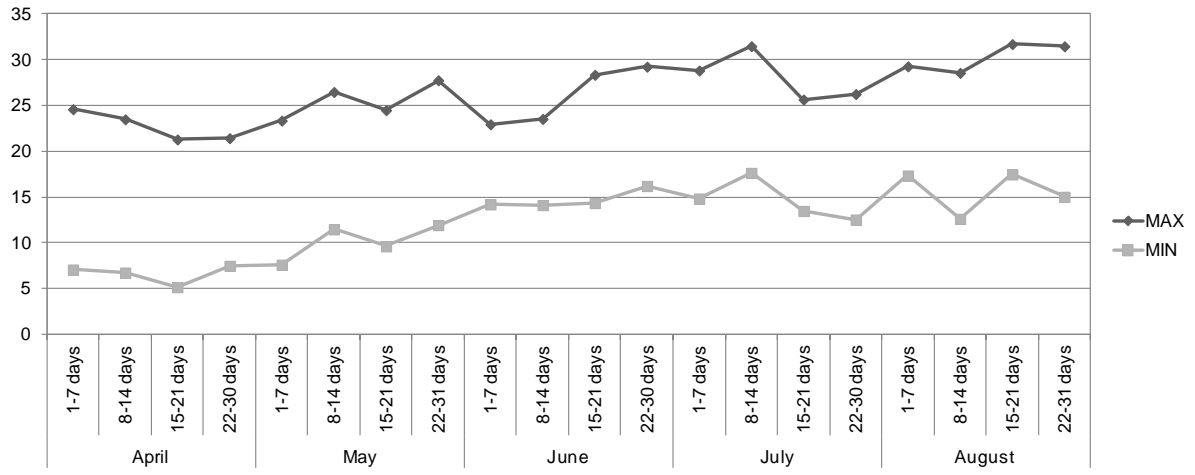

Supplement: 1471-2164-13-639-S1.pdf [file 1471-2164-13-639-S1.pdf]
