# Supplementary material for: Heat shock transcriptional factors in Malus domestica: identification, classification and expression analysis
Source: PubMed Central journal article supplement (PMC3575323; doi:10.1186/1471-2164-13-639), 2012-11-20
Supplement: 1471-2164-13-639-S2.pdf [file 1471-2164-13-639-S2.pdf]

## Additional file 2 – Primer sequences used for quantitative real-time PCR analyses.

| Gene Name        | Primer sequence        |
|------------------|------------------------|
| MdHsfA1a Forw    | GCATCTGAAGCAGGTGATGG   |
| MdHsfA1a Rev     | GCTGCTGCTCTTCATTTTCC   |
| MdHsfA1b Forw    | TCGAATGCAAGGTATTGTTC   |
| MdHsfA1b Rev     | TGCTTGGAAGGCTAGAGACC   |
| MdHsfA1c Forw    | ATGTCAGCAGGTTTGGATGG   |
| MdHsfA1c Rev     | TGCAAATCCTGATTCACAGC   |
| MdHsfA1d Forw    | GTCATCCGAAGGCTTAGTGG   |
| MdHsfA1d Rev     | CATCCCAATCCTTTAGAAATGC |
| MdHsfA9a Forw    | AGGTGGCTCCGTCCAAATA    |
| MdHsfA9a Rev     | TCGAGACGAAGACACTCCAA   |
| MdHsfA2a Forw    | TGCTGCATTGGACAACAAAT   |
| MdHsfA2a Rev     | GCAACCAAATCATCCACCTC   |
| MdHsfA2b Forw    | CTGCATTGGACAACAAATCG   |
| MdHsfA2b Rev     | AACCAAATCCTCCACCTCAA   |
| MdHsfA9b Forw    | ATTGTGGAGCCAAATTGAG    |
| MdHsfA9b Rev     | CATCATAAGCAGAGGGCACA   |
| MdHsfA3a Forw    | TTTCGGTGTCAAGTGTGGTA   |
| MdHsfA3a Rev     | ACTCTCGGGCTCATCAAATG   |
| MdHsfA3b Forw    | CTGCTTGGAGAAACCAAACC   |
| MdHsfA3b Rev     | TTCGCCTTCTTGCTCTGG     |
| MdHsfA3c Forw    | TGATGTCAGTGCCGGTATGT   |
| MdHsfA3c Rev     | ATGCACACTGGACACCTTGA   |
| MdHsfA4a Forw    | CAATGACGGATTTTGGGAAC   |
| MdHsfA4a Rev     | GAGTGAGATGCCCATCTGT    |
| MdHsfA5a/b Forw  | ACAATCAAGCACCTGCACTG   |
| MdHsfA5a/b Rev   | GTGAGTGTTCCGCATCCTT    |
| MdHsfA8a/b Forw  | GCCTGCTGATGCTAGAATGG   |
| MdHsfA8a/b Rev   | GCTTCCCTGATTCTGTTCCA   |
| MdHsfB1a Forw    | GCGATGATGACGAAGAAGAA   |
| MdHsfB1a Rev     | ACACACCTTCCCCTCCTCA    |
| MdHsfB1b Forw    | GGAAAGGCTTGGAGGACATT   |
| MdHsfB1b Rev     | CAGCATCAGCCCCAAATAAT   |
| MdHsfB2a Forw    | AGCATGGTCTCGAATTACGC   |
| MdHsfB2a Rev     | CGGTCTCATCCTCCTCTACG   |
| MdHsfB3a/b Forw  | AACAAAAGGCTGAAGCAGGA   |
| MdHsfB3a/b Rev   | TGCGGTTGCACTAATTTTCA   |
| MdHsfB4a/b Forw  | TCCTCCACCTAATGCCAAAC   |
| MdHsfB4a/b Rev   | GTACTCCTCCGGGTGCAAT    |
| ModHsfC1a/b Forw | TCGGGTTACGCTATACAAA    |
| ModHsfC1a/b Rev  | TCCCTCCAATAGCGAAAATG   |

|                |                         |
|----------------|-------------------------|
| eF-1alpha Forw | ACTG TTCCTGTTGGACGTGTTG |
| eF-1alpha Rev  | TGGAGTTGGAAGCAACGTACCC  |
| IMPA-9 Forw    | TCGTGAACTCAGGCGCTTACTG  |
| IMPA-9 Rev     | AAGCAACGGTAAAGCGGGCAAC  |
| TIP41 Forw     | ACATGCCGGAGATGGTGT TTGG |
| TIP41 Rev      | ACTTCCAGAGTACGGCGTTGTG  |

---
